# Supplementary material for: A role for actin flexibility in thin filament-mediated contractile regulation and myopathy
Source: PubMed Central journal article supplement (PMC7229152; doi:10.1038/s41467-020-15922-5), 2020-05-15
Supplement: 41467_2020_15922_MOESM2_ESM.pdf [file 41467_2020_15922_MOESM2_ESM.pdf]

## Description of Additional Supplementary Files

**File Name:** Supplementary Movie 1

**Description:** Projection of PC1 from a representative ACTCWT monomer cMD simulation. PC1 is projected on the average cMD structure and indicates a hinge domain motion of primarily SD2 and SD4.

**File Name:** Supplementary Movie 2

**Description:** Projection of PC2 from a representative ACTCWT monomer cMD simulation. PC2 is projected on the average cMD structure and indicates a dominant rotational movement.

**File Name:** Supplementary Movie 3

**Description:** Projection of PC1 from a representative ACTCM305L monomer cMD simulation. PC1 is projected on the average cMD structure and shows a decreased hinge domain motion.

**File Name:** Supplementary Movie 4

**Description:** Projection of PC2 from a representative ACTCM305L monomer cMD simulation. PC2 is projected on the average cMD structure and illustrates a reduced rotational movement.
